# Supplementary material for: Epigenetic analysis in rheumatoid arthritis synoviocytes
Source: PubMed Central journal article supplement (PMC6395697; doi:10.1038/s12276-019-0215-5), 2019-02-22

**Fig. S3**

Disease-specific

Shared

OA\_105  
OA\_117  
OA\_59  
OA\_71  
OA\_115  
OA\_119  
OA\_130RA\_114  
RA\_150  
RA\_45  
RA\_117  
RA\_132  
RA\_2  
RA\_109  
RA\_108  
RA\_101  
RA\_133  
RA\_138

0.1      0.05      0.0      0.3      0.6

PMDs total length (fraction of genome)

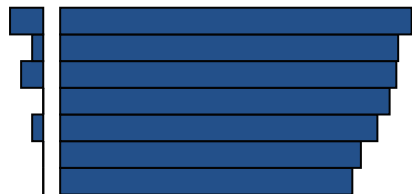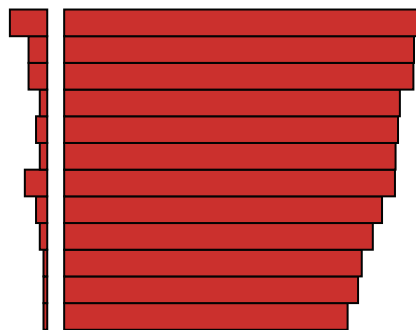

Supplement: 12276_2019_215_MOESM4_ESM.pdf [file 12276_2019_215_MOESM4_ESM.pdf]
