# Supplementary material for: Epigenetic analysis in rheumatoid arthritis synoviocytes
Source: PubMed Central journal article supplement (PMC6395697; doi:10.1038/s12276-019-0215-5), 2019-02-22

Fig. S5

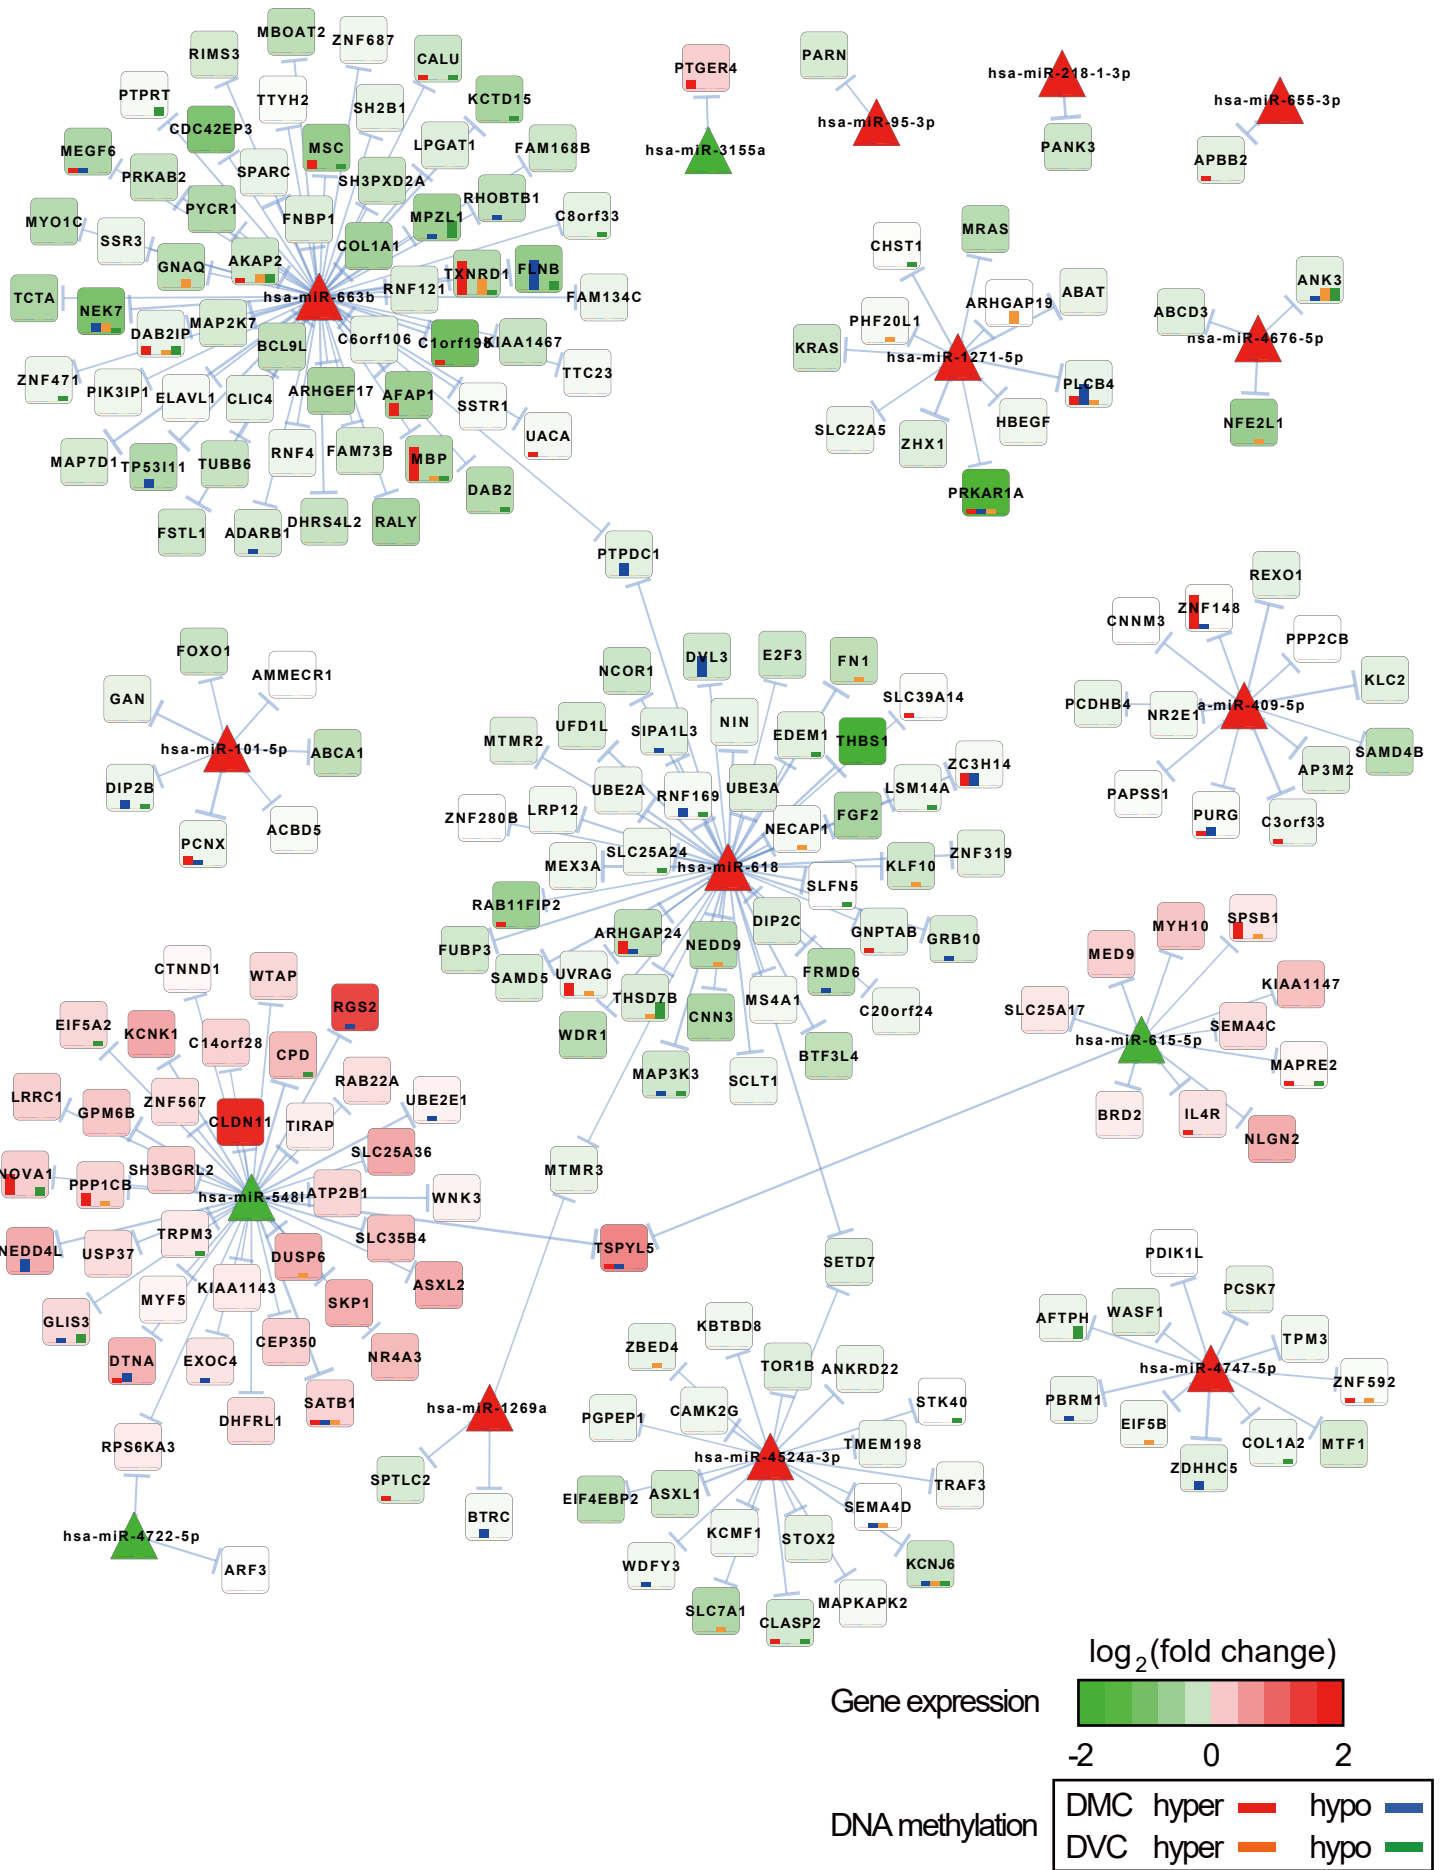

Supplement: 12276_2019_215_MOESM6_ESM.pdf [file 12276_2019_215_MOESM6_ESM.pdf]
